# Supplementary material
Source: PubMed Central journal article supplement (PMC4142814)
Supplement: NIHMS599640-supplement-Supplementary_Data.pdf [file NIHMS599640-supplement-Supplementary_Data.pdf]

1  
2  
3  
4  
5  
6  
7  
8  
9  
10  
11  
12

**Page S1**

Analysis of Androgenic Steroids in Environmental Waters by Large-volume Injection Liquid Chromatography Tandem Mass Spectrometry

**Will J. Backe<sup>†</sup>, Christoph Ort<sup>‡</sup>, Alex J. Brewer, and Jennifer A. Field<sup>\*</sup>**

1007 Agricultural and Life Science Building, Department of Molecular and Environmental Toxicology, Oregon State University, Corvallis, Oregon 97331-4003

<sup>\*</sup> Corresponding author: E-mail: jennifer.field@oregonstate.edu Fax: (541) 737-0497  
<sup>†</sup> 153 Gilbert Hall, Chemistry Department, Oregon State University, Corvallis, Oregon 97331-4003  
<sup>‡</sup> The University of Queensland, Advanced Water Management Centre (AWMC), QLD 4072, Australia

**Table of Contents.**

|               |             |
|---------------|-------------|
| Results       | Page S2     |
| Tables S1-S2  | Page S3-S4  |
| Figures S1-S6 | Page S5-S12 |
| References    | Page S13    |

13

## 14 **Results**

15 **Inter and Intra Day RSD.** The inter and intra-day RSDs in wastewater influent ranged from 1.6 to 6.8 and  
16 3.7 to 6.8 %, respectively, while the combined RSDs ranged from 4.1 to 8.2 % for analytes with stability  
17 regression slopes that are statistically equivalent to zero (**Table S2**). Combining intra and inter-day RSD  
18 describes the overall precision of the method within and between days.<sup>1</sup> Combined RSDs are rarely  
19 calculated, but the inter-day RSDs presented here are slightly lower than what has been presented for  
20 androgens, although the sample matrix of that study was effluent.<sup>2</sup>

**Table S1)** Comparison of concentration values ( $\pm$  95% CI) obtained by standard addition and internal standard calibration for analytes in wastewater influent.

| Analyte                    | Standard Addition Concentration (ng/L) | Internal Standard Calibration Concentration (ng/L) |
|----------------------------|----------------------------------------|----------------------------------------------------|
| <b>Test</b>                | 102 $\pm$ 3.9                          | 97.2 $\pm$ 4.9                                     |
| <b>Ando</b>                | 54.5 $\pm$ 3.0                         | 52.6 $\pm$ 3.7                                     |
| <b>Bold</b>                | 61.6 $\pm$ 7.0                         | 59.0 $\pm$ 3.8                                     |
| <b>5-Andro</b>             | 1620 $\pm$ 40                          | 1260 $\pm$ 120*                                    |
| <b>Meta</b>                | 215 $\pm$ 9.0                          | 216 $\pm$ 9.0                                      |
| <b>6-Meta</b>              | 1630 $\pm$ 130                         | 997 $\pm$ 130*                                     |
| <b>Stan</b>                | 218 $\pm$ 6.7                          | 215 $\pm$ 15                                       |
| <b>16-Stan</b>             | 209 $\pm$ 11                           | 202 $\pm$ 12                                       |
| <b>Tren</b>                | 203 $\pm$ 15                           | 188 $\pm$ 7.5                                      |
| <b>Epi Tren</b>            | 196 $\pm$ 11                           | 188 $\pm$ 4.5                                      |
| <b>Metete</b>              | 191 $\pm$ 6.7                          | 189 $\pm$ 17                                       |
| <b>CH<sub>3</sub>-Test</b> | 209 $\pm$ 6.6                          | 204 $\pm$ 5.7                                      |
| <b>Nand</b>                | 214 $\pm$ 11                           | 208 $\pm$ 17                                       |
| <b>THG</b>                 | 199 $\pm$ 9.4                          | 204 $\pm$ 20                                       |
| <b>Ox</b>                  | 790 $\pm$ 33                           | 775 $\pm$ 11                                       |
| <b>Epi-Ox</b>              | 1580 $\pm$ 77                          | 1360 $\pm$ 120*                                    |

\*indicates statistical difference between concentrations values at the 95% CI.

**Table S2)** RSDs calculated from a one-way ANOVA and stability study data.<sup>3</sup>

|          | Intra Day RSD<br>% | Inter Day RSD<br>% | Combined RSD<br>% |
|----------|--------------------|--------------------|-------------------|
| Test     | 5.1                | 6.3                | 8.1               |
| Ando     | 4.9                | 6.2                | 7.9               |
| Bold     | 4.8                | 1.7                | 5.1               |
| 5-Andro  | 5.9                | 3.1                | 6.7               |
| Meta     | 5.4                | 4.1                | 6.8               |
| 6-Meta   | 6.2                | 5.3                | 8.2               |
| Stan     | 4.7                | 3.4                | 5.8               |
| 16-Stan  | 5.8                | 5.8                | 8.2               |
| Tren     | 5.5                | 3.1                | 6.3               |
| Epi-Tren | 5.7                | 1.6                | 6.0               |
| Mete     | 5.4                | 4.1                | 6.8               |
| CH3-Test | 3.7                | 1.9                | 4.1               |
| Nand     | 4.8                | 3.7                | 6.0               |
| THG      | 6.8                | 4.5                | 8.1               |
| Ox       | 4.6                | 6.8                | 8.2               |
| Epi-Ox   | 6.0                | 11                 | 12                |

25

26

**Figure S1)** Chromatograms of analytes spiked into wastewater effluent matrices near their LOD or LOQ.

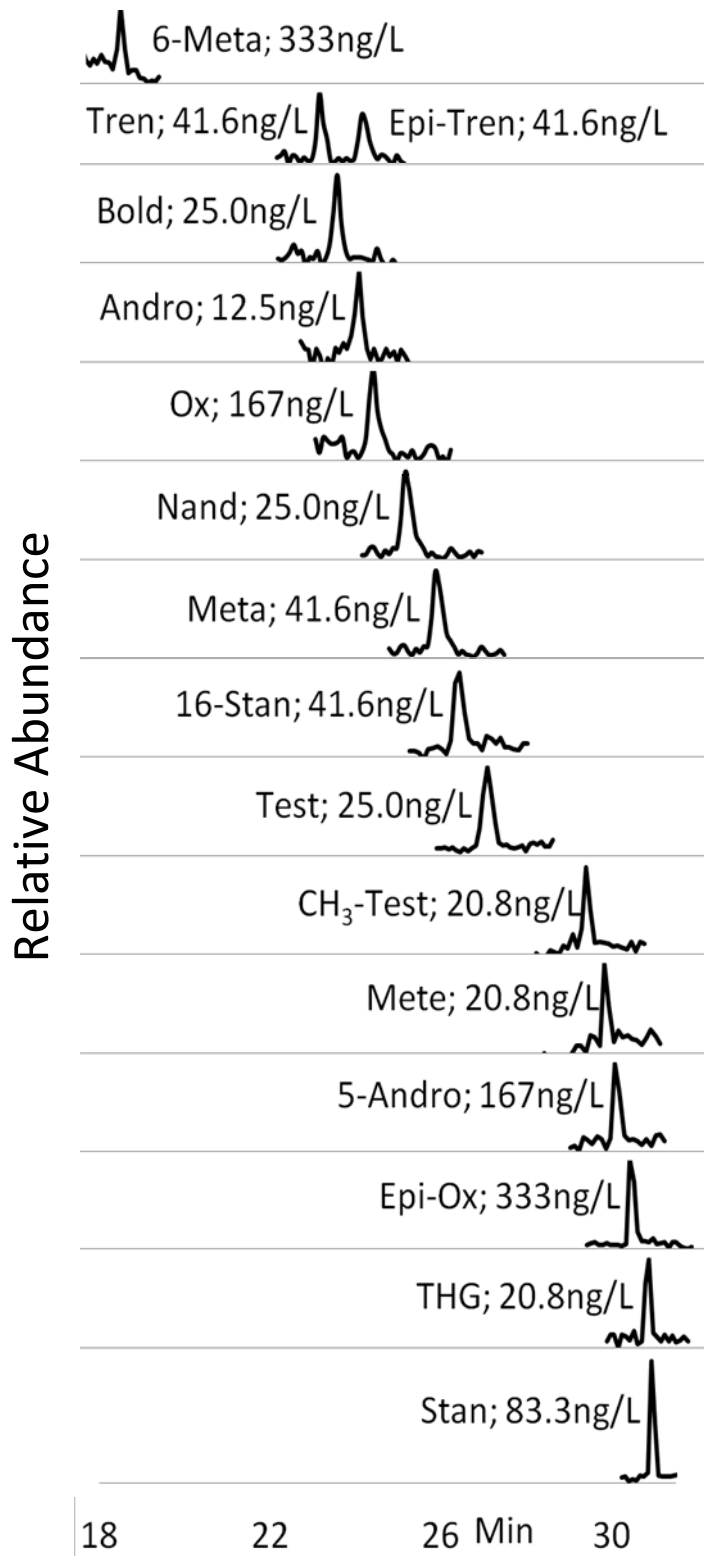

27

28  
29  
31  
33

**Figure S2)** Analytes spiked into river water matrices near their LOD or LOQ.

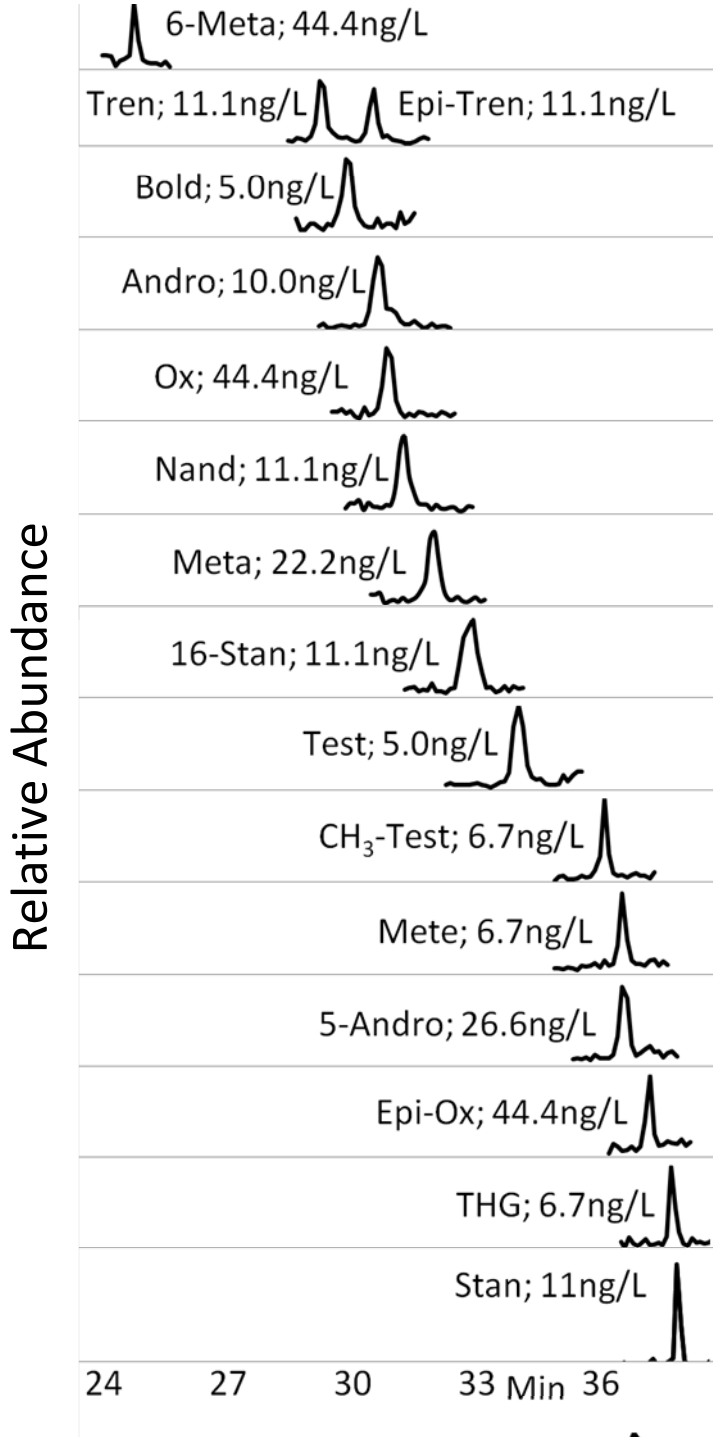

34

35

**Figure S3)** Signal-to-noise as a function of injection volume for selected analytes in wastewater influent. Analyte concentration was kept constant at 250 ng/L.

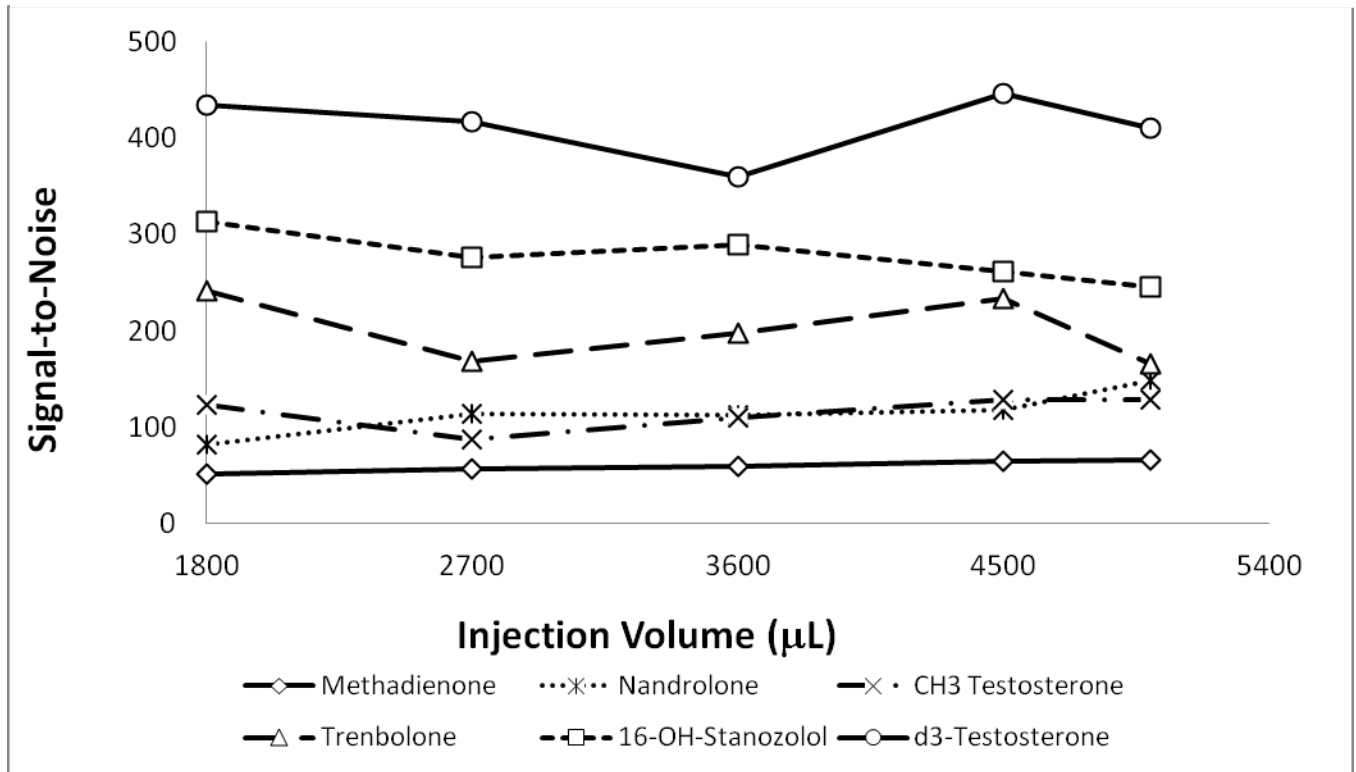

36

37

38

39

40

41

42

43

**Figure S4)** Signal-to-noise as a function of injection volume for selected analytes in wastewater effluent. Analyte concentration was kept constant at 150 ng/L.

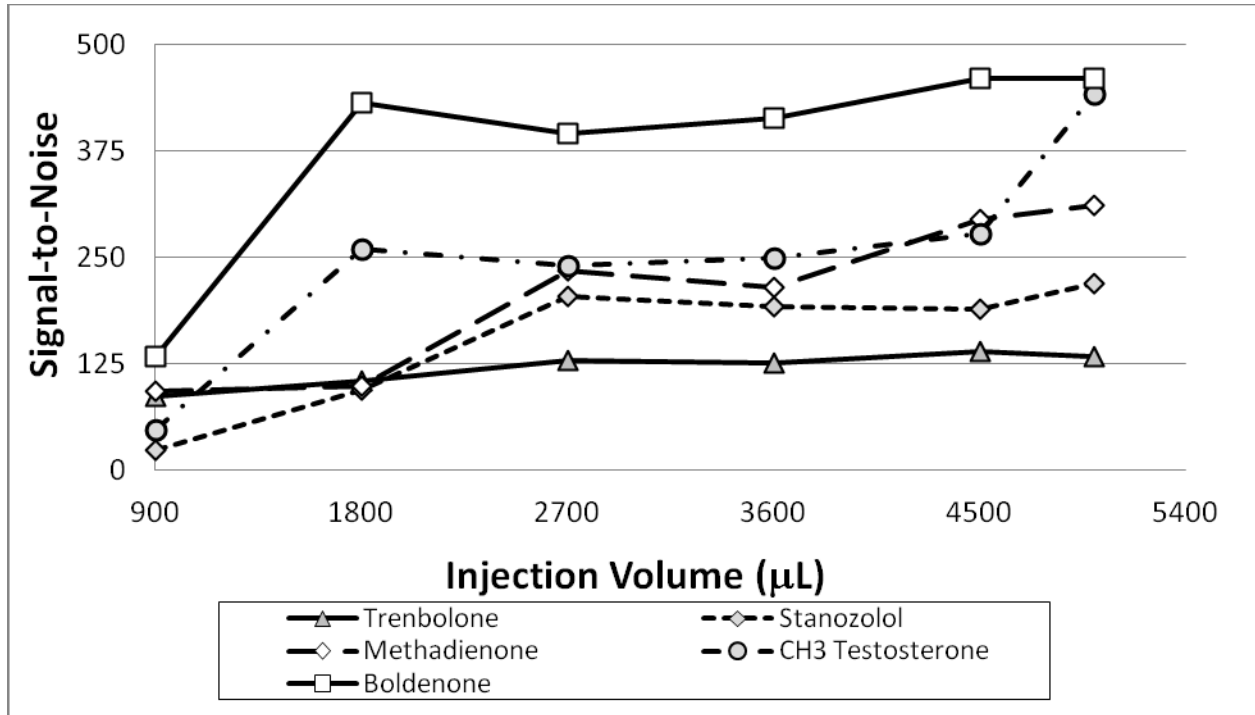

44



45 **Figure S5)** Signal-to-noise as a function of injection volume of selected analytes in fish-housing water. Analyte  
46 concentration was kept constant at 150 ng/L.

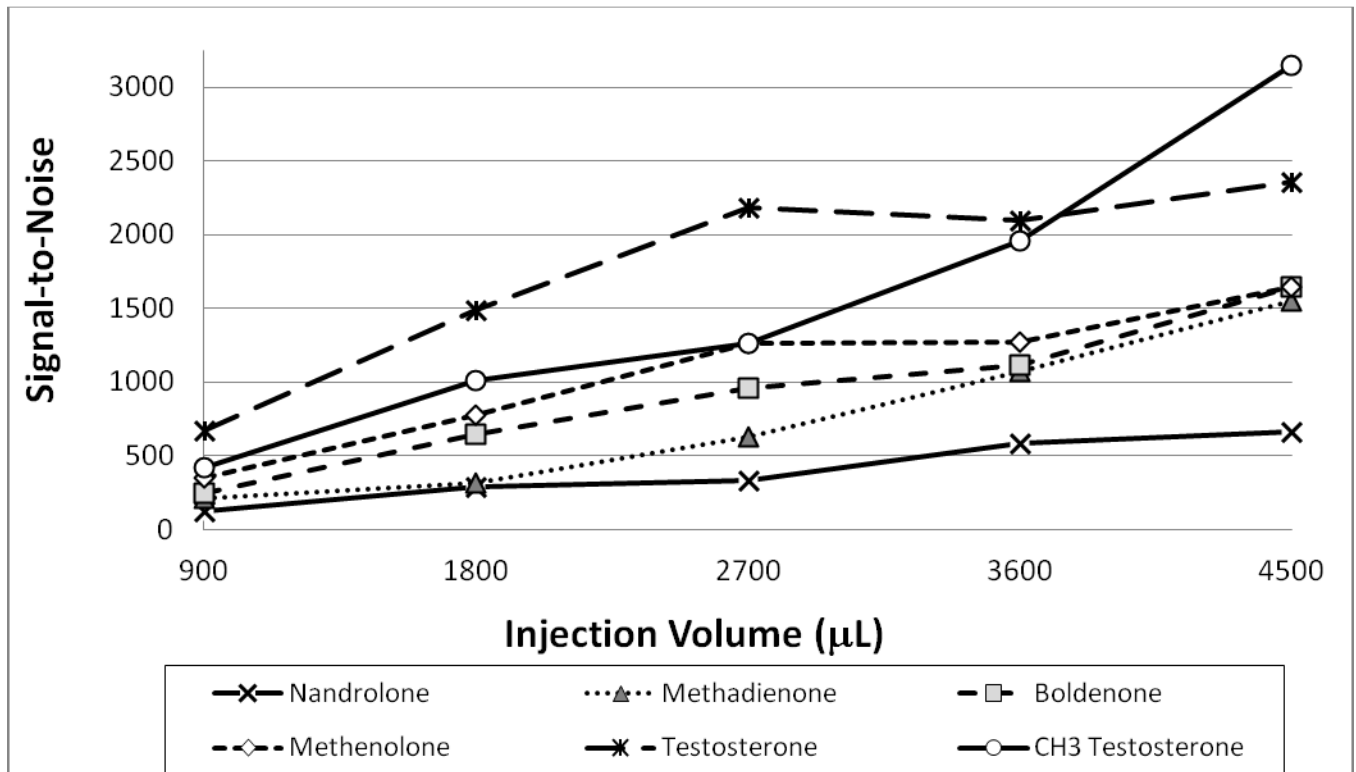

47

48

49

50

**Figure S6)** Diurnal profiles of analyte concentrations ( $\pm$  within-day RSD\*) present in the one hour composite samples of influent. Nandrolone was excluded because most values were below the LOQ.

51

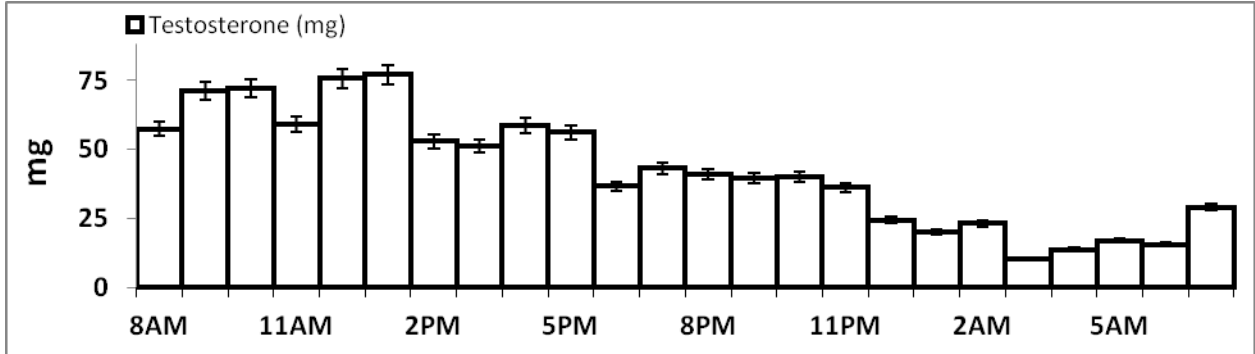

52

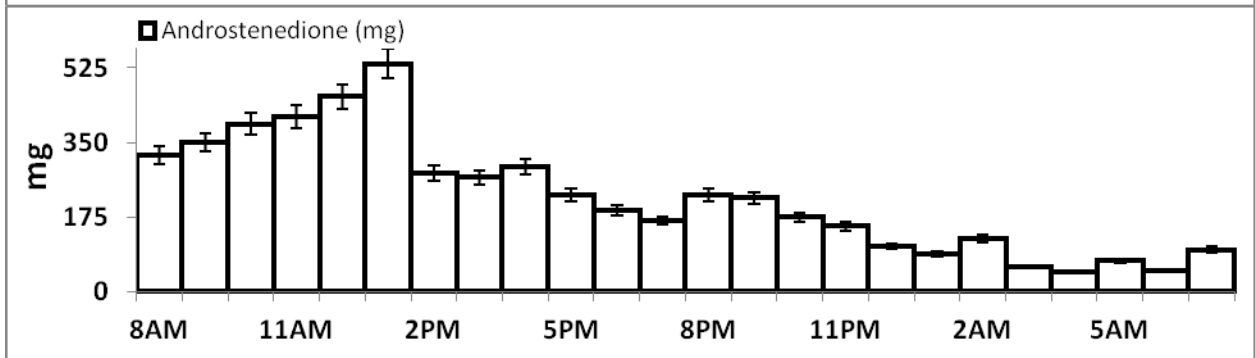

53

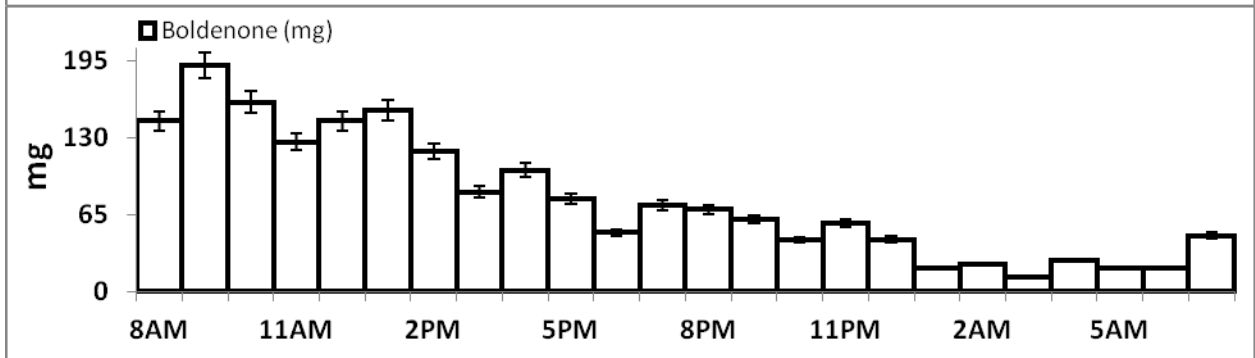

\*Error bars are given in  $\text{mg} \pm (\text{mass load (mg)} \times \text{within-day RSD}\%)$

54

55

56

**Figure S7)** Correlation of Boldenone loads to Testosterone loads in one-hr composite waste water influent samples

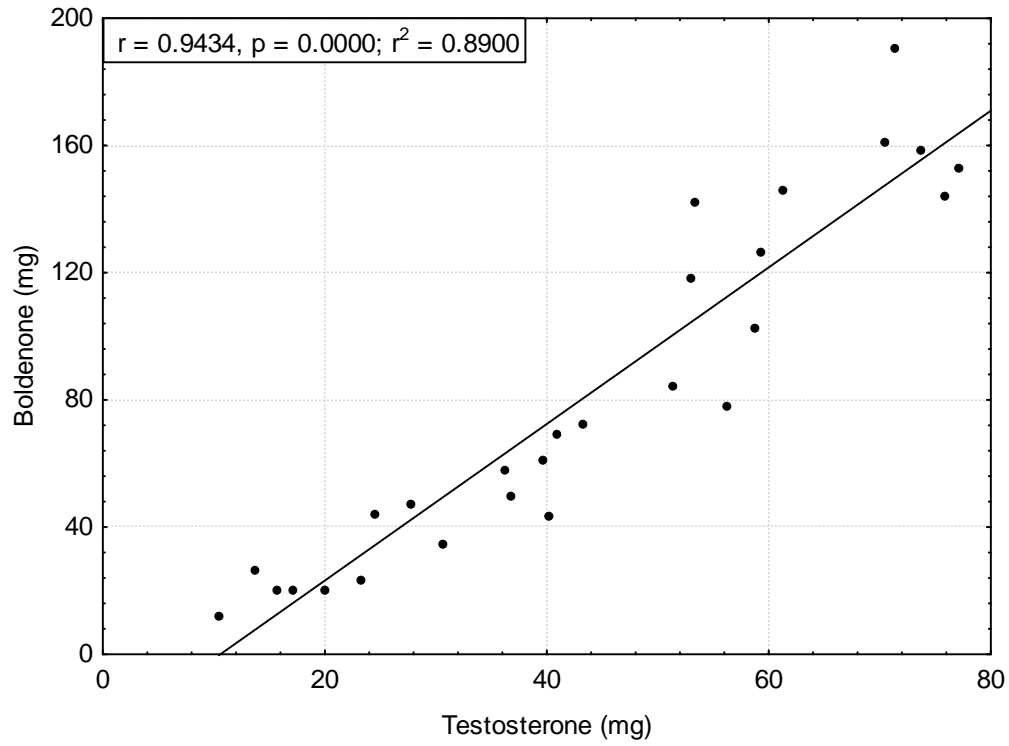

57

58

59

60

**Figure S8)** Analyte concentrations in wastewater influent over time. d<sub>3</sub>-Test was spiked into wastewater influent to test if d<sub>3</sub>-Bold would be produced.

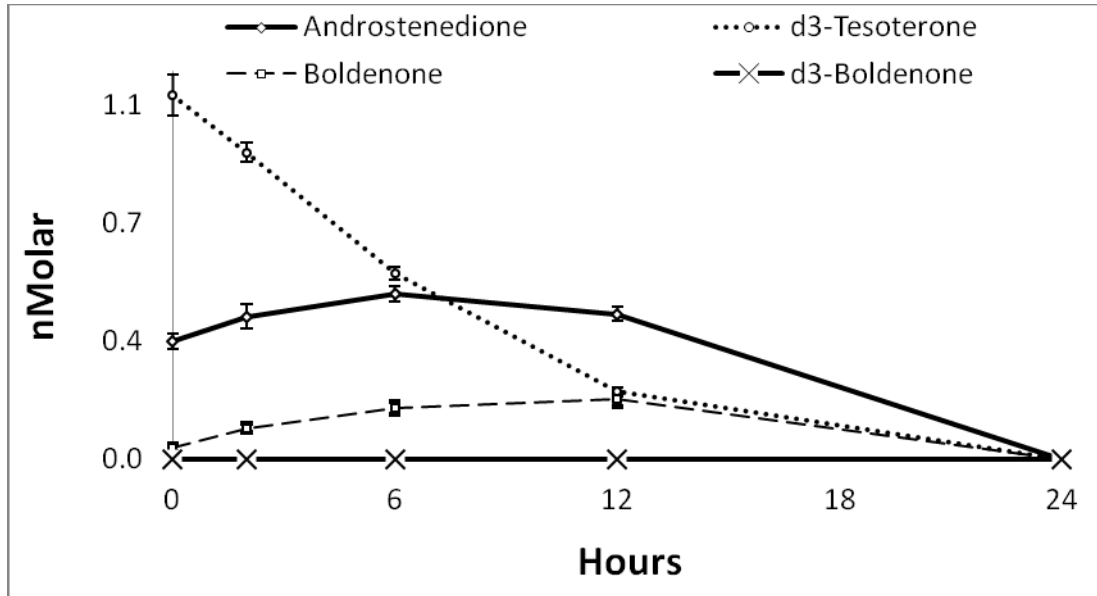

61

62

63

64 (1) Chiaia, A. C.; Banta-Green, C.; Field, J. *Environ. Sci. Technol.* **2008**, *42*, 8841-8848.

65 (2) Schroder, H. F.; Gebhardt, W.; Thevis, M.; *Anal. Bioanal. Chem.* **2010**, *398*, 1207-1229.

66 (3) Anderson, R. L., *Practical Statistics for Analytical Chemists*. Van Nostrand Reinhold Company Inc.:

67 New York, 1987.

68
